# Supplementary material
Source: PubMed Central journal article supplement (PMC10915328)
Supplement: ajcr0014-0490-f10.pdf [file ajcr0014-0490-f10.pdf]

## Anillin promotes prostate cancer progression

**Table S1.** The sequences of siRNAs

| SiRNAs     | Sense (5'-3')         | Antisense (5'-3')      |
|------------|-----------------------|------------------------|
| si-ANLN-1  | UCACAUCUUAUACCACAAATT | UUUGUGGUUUAUAGAUGUGAGG |
| si-ANLN-2  | GCCUCUUUGAAUAAAGCCCUA | UAGGGCUUUUUAUCAAGAGGC  |
| si-IGF2BP1 | CCAUCCGCAACAUCACAAATT | UUUGUGAUGUUGCGGAUGGTT  |
| si-NC      | UUCUCCGAACGUGUCACGU   | ACGUGACACGUUCGGAGAA    |

**Table S2.** The sequences of gene fragments cloned into plasmids

| ShRNAs    | Sequence (5'-3')                                           |
|-----------|------------------------------------------------------------|
| sh-ANLN-1 | CCGGCCTCACATCTATAACCACAACTCGAGTTTGTGGTTATAGATGTGAGG TTTTGG |
| sh-ANLN-2 | CCGGGCAAACAAC TAGAAACCAACTCGAGTTGGTTTCTAGTTGTTTGTCTTTTGG   |
| sh-NC     | TTCTCCGAACGTGTCACGTCTCGAGACGTGACACGTTCCGAGAATTTTT          |

**Table S3.** The sequences of primers for qRT-PCR

| Primers        | Forward (5'-3')       | Reverse (5'-3')         |
|----------------|-----------------------|-------------------------|
| ANLN           | TGCCAGGCGAGAGAATCTTC  | CGCTTAGCATGAGTCATAGACCT |
| IGF2BP1        | GCGGCCAGTTCTTGGTCAA   | TTGGGCACCGAATGTTCAATC   |
| $\beta$ -actin | CATGTACGTTGCTATCCAGGC | CTCCTTAATGTCACGCACGAT   |
| GAPDH          | GGAGCGAGATCCCTCCAAAAT | GGCTGTTGTCATACTTCTCATGG |

**Table S4.** Primary antibodies used in this study

| Target           | Dilution | Company     | Catalog Number |
|------------------|----------|-------------|----------------|
| ANLN             | 1:800    | SantaCruz   | sc-271814      |
| IGF2BP1          | 1:5000   | Proteintech | 22803-1-AP     |
| Total-ERK1/2     | 1:2000   | Proteintech | 11257-1-AP     |
| phospho-ERK1/2   | 1:5000   | Proteintech | 28733-1-AP     |
| phospho-p38 MAPK | 1:1000   | Proteintech | 28796-1-AP     |
| Total-p38 MAPK   | 1:1000   | Proteintech | 14064-1-AP     |
| c-MYC            | 1:5000   | Proteintech | 10828-1-AP     |
| GAPDH            | 1:5000   | Proteintech | 10494-1-AP     |
| Alpha Tubulin    | 1:5000   | Proteintech | 11224-1-AP     |

## Anillin promotes prostate cancer progression

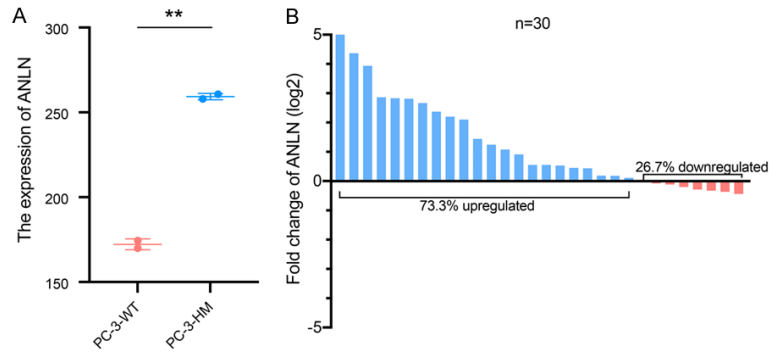

**Figure S1.** A. The normalized intensity of ANLN in two pairs of wild-type and highly invasive PC-3 cells.  $**P < 0.01$ . B. The expression ratio of ANLN in PCa and ANP tissues of 30 patients.

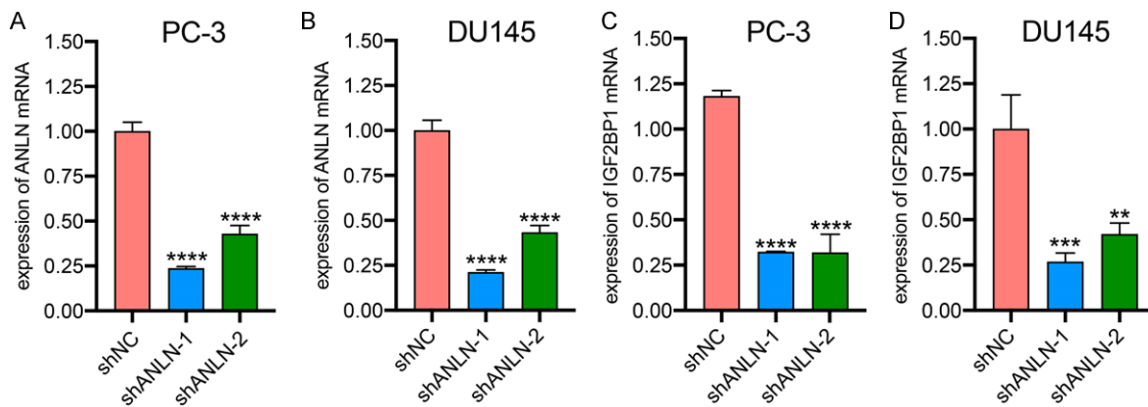

**Figure S2.** A, B. RT-qPCR was used to detect the efficiencies of ANLN knockdown.  $****P < 0.0001$ . C, D. RT-qPCR result showing the expression of IGF2BP1 in PC-3 and DU145 cells treated with ANLN knockdown.  $**P < 0.01$ ,  $***P < 0.001$ ,  $****P < 0.0001$ .

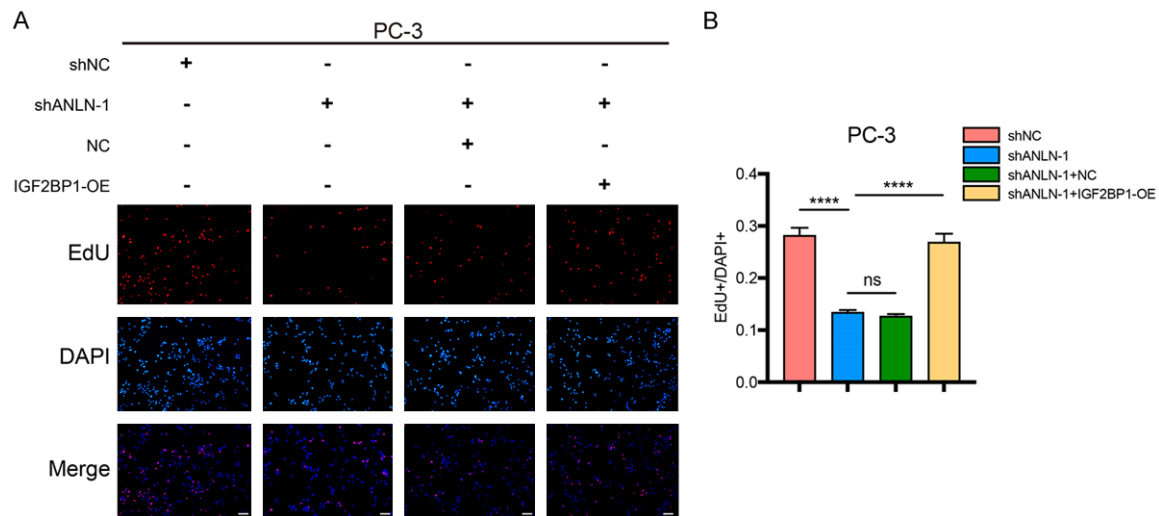

**Figure S3.** A, B. Result of EdU assay showing the cell proliferation in PC-3 cell expressing the different constructs. ns  $P \geq 0.05$ ,  $****P < 0.0001$ . Scale bar = 100  $\mu$ m.

# Anillin promotes prostate cancer progression

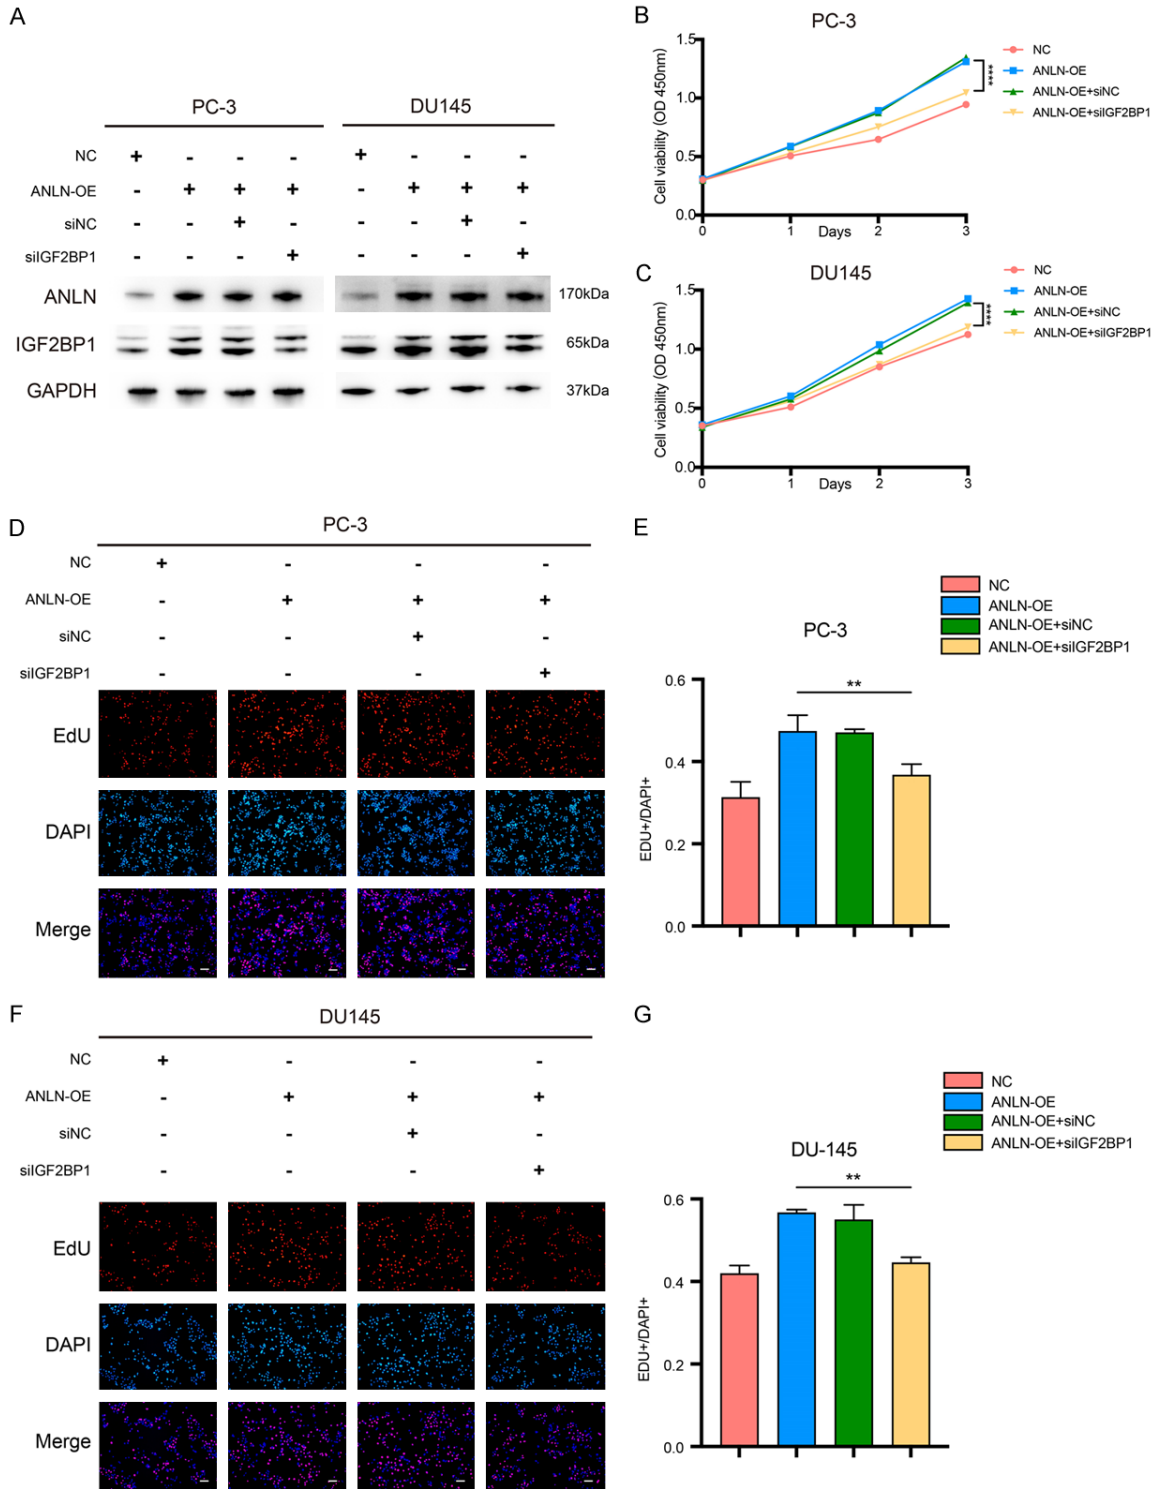

**Figure S4.** Knocking down IGF2BP1 in ANLN overexpression cells will rescue the promoting effect of ANLN overexpression on the proliferation of prostate cancer cells. A. Western blot analysis of ANLN and IGF2BP1 expression in PC-3 and DU145 cells expressing different vectors. B, C. Cell mobility was assessed by CCK-8 assays in cells expressing the different constructs.  $****P < 0.0001$ . D-G. Result of EdU assay showing the cell proliferation in PC-3 and DU145 cells expressing the different constructs.  $**P < 0.01$ . Scale bar = 100  $\mu$ m.

## Anillin promotes prostate cancer progression

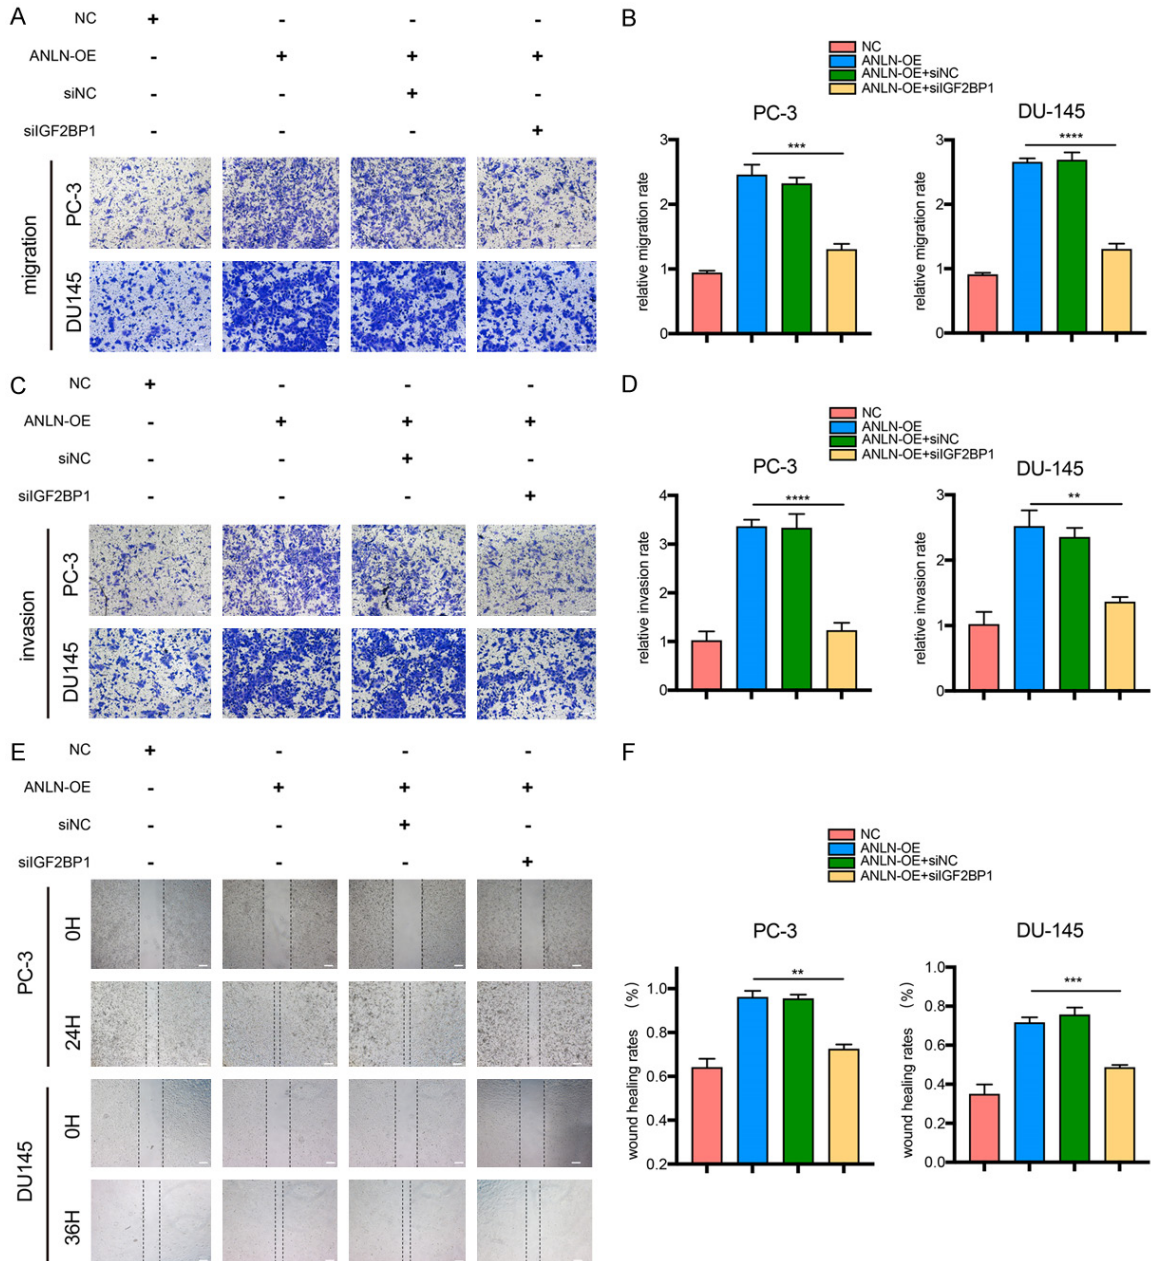

**Figure S5.** Knocking down IGF2BP1 in ANLN overexpression cells will rescue the promoting effect of ANLN overexpression on the migration and invasion of prostate cancer cells. A-D. Representative images and quantification of cell migration and invasion in DU145 and PC-3 cells were measured using transwell assays.  $**P < 0.01$ ,  $***P < 0.001$ ,  $****P < 0.0001$ . E, F. Representative images of the wound-healing assays for prostate cancer cells expressing different vectors.  $**P < 0.01$ ,  $***P < 0.001$ . Scale bar = 100  $\mu\text{m}$ .
